# Supplementary material for: Clinicopathological Features of Non-Small Cell Lung Carcinoma with BRAF Mutation
Source: MDPI journal article supplement (doi:10.3390/curroncol30110728), 2023-11-19
Supplement: s1 [file s1]

**Supplementary Table S1.** Pathological features of cases examined.

| N  | Age | Sex | Site                   | Material    | Histotype        | PD-L1 | V600E (Y,N) | Aminoacid change | Co-mutations |
|----|-----|-----|------------------------|-------------|------------------|-------|-------------|------------------|--------------|
| 1  | 67  | M   | hilar lymph node       | cytological | adenoca          | neg   | N           | D594N            | CHD4         |
| 2  | 63  | F   | mediastinal lymph node | cytological | adenoca          | high  | Y           | V600E            |              |
| 3  | 65  | M   | bone                   | biopsy      | adenoca          | low   | N           | N581S            |              |
| 4  | 74  | M   | lung                   | biopsy      | adenoca          | low   | N           | G596R            |              |
| 5  | 74  | M   | lung                   | biopsy      | adenoca          | high  | N           | G466V            | KRAS, PIK3CA |
| 6  | 73  | F   | lung                   | biopsy      | adenoca          | low   | Y           | V600E            | KRAS, MET    |
| 7  | 74  | M   | bone                   | biopsy      | adenoca          | low   | N           | G466A            | FGFR3        |
| 8  | 85  | M   | lung                   | cytological | adenoca          | high  | N           | D594F            | KRAS, PAM2K1 |
| 9  | 83  | F   | lung                   | cytological | adenosquamous ca | high  | N           | N581S            |              |
| 10 | 67  | M   | lung                   | cytological | adenoca          | neg   | N           | D594N            |              |
| 11 | 67  | M   | lung                   | biopsy      | adenoca          | neg   | N           | N581S            | FGFR3        |
| 12 | 77  | F   | lung                   | biopsy      | adenoca          | low   | N           | L584F            | KRAS         |
| 13 | 63  | M   | stomach (metastasis)   | biopsy      | adenoca          | high  | N           | D594G            |              |
| 14 | 78  | M   | bone                   | biopsy      | adenoca          | low   | N           | G469V            |              |
| 15 | 79  | M   | pleura                 | biopsy      | adenoca          | high  | Y           | V600E            |              |
| 16 | 76  | M   | hilar lymph node       | cytological | adenoca          | high  | N           | G469V            |              |
| 17 | 52  | M   | pericardial effusion   | cytological | adenoca          | low   | N           | L597Q            |              |
| 18 | 62  | M   | lung                   | biopsy      | adenoca          | neg   | N           | G466A            |              |
| 19 | 71  | M   | pleura                 | biopsy      | adenoca          | low   | N           | G464V            | KRAS         |
| 20 | 72  | M   | pleura                 | biopsy      | adenoca          | low   | N           | G469A            |              |
| 21 | 84  | M   | lung                   | surgical    | adenoca          | low   | Y           | V600E            |              |
| 22 | 45  | F   | lung                   | biopsy      | adenoca          | high  | Y           | V600E            | AKT1, MTOR   |
| 23 | 58  | F   | mediastinal lymph node | cytological | adenoca          | high  | Y           | V600E            |              |
| 24 | 81  | F   | mediastinal lymph node | cytological | adenoca          | low   | N           | N581S            |              |
| 25 | 96  | F   | lung                   | cytological | adenoca          |       | Y           | V600E            |              |
| 26 | 81  | F   | lung                   | cytological | adenoca          | neg   | Y           | V600E            |              |
| 27 | 64  | M   | liver (metastasis)     | biopsy      | adenoca          | high  | Y           | V600E            | IDH1         |
| 28 | 79  | M   | lung                   | biopsy      | adenoca          | high  | Y           | V600E            | PIK3CA       |
| 29 | 65  | F   | lung                   | biopsy      | adenoca          | high  | Y           | V600E            |              |
| 30 | 78  | M   | lung                   | surgical    | adenoca          | high  | N           | K601E            |              |
| 31 | 67  | M   | lung                   | biopsy      | adenoca          | low   | N           | K601E            |              |
| 32 | 79  | F   | mediastinal lymph node | cytological | adenoca          | low   | N           | G469A            | ESR1         |
| 33 | 79  | M   | lung                   | cytological | adenoca          | high  | Y           | V600E            |              |
| 34 | 75  | M   | lung                   | surgical    | adenoca          | low   | Y           | V600E            |              |
| 35 | 68  | M   | lung                   | surgical    | adenoca          | neg   | Y           | V600E            | PIK3CA       |
| 36 | 65  | M   | lung                   | biopsy      | adenoca          | low   | Y           | V600E            |              |
| 37 | 68  | F   | lung                   | cytological | adenoca          | low   | Y           | V600E            |              |
| 38 | 55  | M   | lung                   | biopsy      | adenoca          | high  | N           | G464V            | KRAS         |
| 39 | 55  | F   | lung                   | surgical    | adenoca          | low   | N           | G469V            |              |
| 40 | 84  | F   | pleura                 | biopsy      | adenoca          | low   | Y           | V600E            |              |
| 41 | 47  | M   | mediastinal lymph node | cytological | NOS              | high  | N           | G469A            | PIK3CA       |
| 42 | 73  | F   | lung                   | surgical    | adenoca          |       | N           | D594N            |              |
| 43 | 77  | F   | lung                   | cytological | adenoca          |       | N           | G469A            | PIK3CA       |
| 44 | 55  | F   | hilar lymph node       | surgical    | adenoca          |       | Y           | V600E            |              |
| 45 | 69  | F   | mediastinal lymph node | cytological | adenoca          | high  | Y           | V600E            |              |
| 46 | 68  | F   | lung                   | surgical    | adenoca          |       | N           | G466A            |              |

|    |    |   |                        |             |                  |      |   |       |            |
|----|----|---|------------------------|-------------|------------------|------|---|-------|------------|
| 47 | 77 | F | pleura                 | biopsy      | adenoca          | low  | N | D594N |            |
| 48 | 74 | M | mediastinal lymph node | cytological | adenoca          | low  | Y | V600E |            |
| 49 | 61 | M | mediastinal lymph node | cytological | adenoca          | high | N | G466A |            |
| 50 | 79 | M | lung                   | biopsy      | adenoca          | low  | N | E586G | EGFR       |
| 51 | 60 | F | lung                   | biopsy      | adenoca          | neg  | Y | V600E | IDH1       |
| 52 | 70 | M | lung                   | biopsy      | NOS              |      | N | G258V | KRAS       |
| 53 | 72 | M | lung                   | biopsy      | squamous cell ca | high | N | V471F |            |
| 54 | 68 | M | lung                   | biopsy      | adenoca          | low  | Y | V600E |            |
| 55 | 73 | F | lung                   | biopsy      | adenoca          | low  | N | G466A |            |
| 56 | 83 | F | lung                   | biopsy      | adenoca          | high | N | G466V |            |
| 57 | 80 | M | bone                   | biopsy      | adenoca          | low  | N | G466V | KRAS, EGFR |
| 58 | 79 | M | pleura                 | biopsy      | adenoca          | low  | Y | V600E |            |
| 59 | 79 | M | lung                   | surgical    | adenoca          |      | Y | V600E |            |
| 60 | 78 | M | lung                   | biopsy      | sarcomatoid ca   | high | N | N581I | GNAQ       |

Legend: N Number, M male, F female, adenoca adenocarcinoma, ca carcinoma, NOS not otherwise specified, neg negative, Y yes, N no, TPS tumor proportion score). In PD-L1: negative TPS<1%; low TPS 1-49%, high TPS ≥50%.

**Supplementary Table S2.** Clinical stages and therapeutic regimens of cases examined. TKI therapy against BRAF is highlighted in **red** (alone and/or with CT: total N. 11 cases).

| N  | Age | Sex | Stage | Adjuvant therapy | Adjuvant regimen | First line therapy | First line regimen                       | Second line therapy | Second line regimen           | Third line therapy | Third line regimen |
|----|-----|-----|-------|------------------|------------------|--------------------|------------------------------------------|---------------------|-------------------------------|--------------------|--------------------|
| 1  | 67  | M   | IIIB  |                  |                  | CT                 | carboplatinum, gemcitabine               | none                |                               |                    |                    |
| 2  | 63  | F   | IV    |                  |                  | none               |                                          |                     |                               |                    |                    |
| 3  | 65  | M   | IV    |                  |                  | CT                 | carboplatinum, pemetrexed                | none                |                               |                    |                    |
| 4  | 74  | M   | IIIB  |                  |                  | none               |                                          |                     |                               |                    |                    |
| 5  | 74  | M   | IV    |                  |                  | IT                 | pembrolizumab                            | CT                  | carboplatinum, pemetrexed     | CT                 | paclitaxel         |
| 6  | 73  | F   | IV    |                  |                  | CT-IT              | carboplatinum, pemetrexed, pembrolizumab | <b>TKI (BRAF)</b>   | <b>dabrafenib, trametinib</b> |                    |                    |
| 7  | 74  | M   | IV    |                  |                  | CT-IT              | carboplatinum, pemetrexed, pembrolizumab | none                |                               |                    |                    |
| 8  | 85  | M   | IV    |                  |                  | IT                 | pembrolizumab                            | none                |                               |                    |                    |
| 9  | 83  | F   | IIIA  |                  |                  | CT                 | carboplatinum, gemcitabine               | nv                  |                               |                    |                    |
| 10 | 67  | M   | IV    |                  |                  | CT-IT              | carboplatinum, pemetrexed, pembrolizumab | CT                  | carboplatinum, gemcitabine    | none               |                    |
| 11 | 67  | M   | IV    |                  |                  | CT-IT              | carboplatinum, pemetrexed, pembrolizumab | CT                  | docetaxel                     |                    |                    |
| 12 | 77  | F   | IV    |                  |                  | none               |                                          |                     |                               |                    |                    |
| 13 | 63  | M   | IV    |                  |                  | IT                 | pembrolizumab                            | CT                  | carboplatinum, pemetrexed     |                    |                    |
| 14 | 78  | M   | IV    |                  |                  | none               |                                          |                     |                               |                    |                    |
| 15 | 79  | M   | IV    |                  |                  | <b>TKI (BRAF)</b>  | <b>dabrafenib, trametinib</b>            |                     |                               |                    |                    |
| 16 | 76  | M   | IV    |                  |                  | IT                 | pembrolizumab                            | none                |                               |                    |                    |
| 17 | 52  | M   | IV    |                  |                  | none               |                                          |                     |                               |                    |                    |
| 18 | 62  | M   | IV    |                  |                  | CT-IT              | carboplatinum, pemetrexed,               | CT                  | vinorelbine (oral)            | none               |                    |

|    |    |   |               |    |                                 |               | pembrolizumab                                      |               |                                   |                                      |
|----|----|---|---------------|----|---------------------------------|---------------|----------------------------------------------------|---------------|-----------------------------------|--------------------------------------|
| 19 | 71 | M | nv            |    |                                 | nv            |                                                    |               |                                   |                                      |
| 20 | 72 | M | nv            |    |                                 | none          |                                                    |               |                                   |                                      |
| 21 | 84 | M | nv<br>(POR)   |    |                                 | none          |                                                    |               |                                   |                                      |
| 22 | 45 | F | nv            |    |                                 | TKI<br>(BRAF) | dabrafenib,<br>trametinib                          | IT            | pembrolizuma<br>b                 | CT pemetrexed,<br>cisplatinu         |
| 23 | 58 | F | nv            |    |                                 | IT            | pembrolizumab                                      | CT            | carboplatinu<br>m<br>gemcitabine  | none                                 |
| 24 | 81 | F | nv            |    |                                 | CT            | gemcitabine                                        | IT            | atezolizumab                      |                                      |
| 25 | 96 | F | nv            |    |                                 | none          |                                                    |               |                                   |                                      |
| 26 | 81 | F | IV            |    |                                 | none          |                                                    |               |                                   |                                      |
| 27 | 64 | M | IV            |    |                                 | TKI<br>(BRAF) | dabrafenib,<br>trametinib                          |               |                                   |                                      |
| 28 | 79 | M | IV            |    |                                 | none          |                                                    |               |                                   |                                      |
| 29 | 65 | F | IV            |    |                                 | IT            | atezolizumab                                       |               |                                   |                                      |
| 30 | 78 | M | nv<br>(POR)   |    |                                 | none          |                                                    |               |                                   |                                      |
| 31 | 67 | M | nv            |    |                                 | CT            | carboplatinu<br>m,<br>paclitaxel                   | IT            | durvalumab                        |                                      |
| 32 | 79 | F | IV            |    |                                 | CT-IT         | carboplatinu<br>m,<br>pemetrexed,<br>pembrolizumab | none          |                                   |                                      |
| 33 | 79 | M | IV            |    |                                 | IT            | pembrolizumab                                      | none          |                                   |                                      |
| 34 | 75 | M | IIB *         |    |                                 | TKI<br>(BRAF) | dabrafenib,<br>trametinib                          | nv            |                                   |                                      |
| 35 | 68 | M | IIB           | CT | cisplatinu<br>m,<br>vinorelbine | none          |                                                    | nv            |                                   |                                      |
| 36 | 65 | M | IV            |    |                                 | CT            | carboplatinu<br>m,<br>pemetrexed,<br>pembrolizumab | TKI<br>(BRAF) | dabrafeninb,<br>trametinib        |                                      |
| 37 | 68 | F | IV            |    |                                 | TKI<br>(BRAF) | dabrafenib,<br>trametinib                          | none          |                                   |                                      |
| 38 | 55 | M | IV            |    |                                 | IT            | pembrolizumab                                      | none          |                                   |                                      |
| 39 | 55 | F | IIA*          | CT |                                 | none          |                                                    |               |                                   |                                      |
| 40 | 84 | F | IV            |    |                                 | TKI<br>(BRAF) | dabrafenib,<br>trametinib                          |               |                                   |                                      |
| 41 | 47 | M | IV            |    |                                 | IT            | pembrolizumab                                      | none          |                                   |                                      |
| 42 | 73 | F | IIIA<br>(POR) |    |                                 | none          |                                                    |               |                                   |                                      |
| 43 | 77 | F | IV            |    |                                 | CT            | cisplatinu<br>m,<br>pemetrexed                     | IT            | nivolumab                         | CT carboplatinu<br>m,<br>gemcitabine |
| 44 | 55 | F | IIB*          | CT | cisplatinu<br>m,<br>gemcitabine | none          |                                                    |               |                                   |                                      |
| 45 | 69 | F | IIIB          |    |                                 | TKI<br>(BRAF) | dabrafenib,<br>trametinib                          |               |                                   |                                      |
| 46 | 68 | F | IA*<br>(POR)  |    |                                 | none          |                                                    |               |                                   |                                      |
| 47 | 77 | F | IV            |    |                                 | CT-IT         | carboplatinu<br>m,<br>pemetrexed,<br>pembrolizumab | CT            | docetaxel<br>(weekly)             |                                      |
| 48 | 74 | M | IV            |    |                                 | IT            | relatlimab,<br>nivolumab,<br>ipilimumab            | CT            | gemcitabine,<br>carboplatinu<br>m | CT vinorelbine                       |
| 49 | 61 | M | nv            |    |                                 | nv            |                                                    |               |                                   |                                      |
| 50 | 79 | M | IV            |    |                                 | TKI<br>(EGFR) | osimertinib                                        | CT            | gemcitabine                       | CT vinorelbine                       |

|    |    |   |              |               |                                                |               |                           |
|----|----|---|--------------|---------------|------------------------------------------------|---------------|---------------------------|
| 51 | 60 | F | IIIC         | CT            | carboplatinum,<br>paclitaxel                   | TKI<br>(BRAF) | dabrafenib,<br>trametinib |
| 52 | 70 | M | nv           | none          |                                                |               |                           |
| 53 | 72 | M | nv           | CT            | gemcitabine,<br>carboplatinum                  | IT            | durvalumab                |
| 54 | 68 | M | nv           | TKI<br>(BRAF) | dabrafenib,<br>trametinib                      | none          |                           |
| 55 | 73 | F | nv           | CT-IT         | carboplatinum,<br>pemetrexed,<br>pembrolizumab |               |                           |
| 56 | 83 | F | nv           | nv            |                                                |               |                           |
| 57 | 80 | M | IV           | nv            |                                                |               |                           |
| 58 | 79 | M | IV           | nv            |                                                |               |                           |
| 59 | 79 | M | IA*<br>(POR) | nv            |                                                |               |                           |
| 60 | 78 | M | nv           | IT            | pembrolizumab                                  |               |                           |

Legend: N Number, CT chemotherapy, IT immunotherapy, TKIs tyrosine kinase inhibitors, nv not valuable (information not available), none no therapy (no therapy administered during FU), POR postoperative recurrence. \* in these cases, the stage was based on the initial pathological diagnosis performed on the surgical specimen.

**Supplementary Table S3.** Data on OS and PFS.

| N  | Age | Sex | OS months | OS status | PFS months | PFS status |
|----|-----|-----|-----------|-----------|------------|------------|
| 1  | 67  | M   | 2         | 1         | 2          | 1          |
| 2  | 63  | F   | 0         | 1         | 0          | 1          |
| 3  | 65  | M   | 6         | 1         | 6          | 1          |
| 4  | 74  | M   | 1         | 1         | 1          | 1          |
| 5  | 74  | M   | 19        | 1         | 10         | 1          |
| 6  | 73  | F   | 23        | 1         | 23         | 1          |
| 7  | 74  | M   | 2         | 1         | 2          | 1          |
| 8  | 85  | M   | 7         | 1         | 7          | 1          |
| 9  | 83  | F   | 4         | 1         | 4          | 1          |
| 10 | 67  | M   | 8         | 1         | 5          | 1          |
| 11 | 67  | M   | 8         | 1         | 5          | 1          |
| 12 | 77  | F   | 6         | 1         | 6          | 1          |
| 13 | 63  | M   | 6         | 1         | 6          | 1          |
| 14 | 78  | M   | 0         | 1         | 0          | 1          |
| 15 | 79  | M   | 6         | 1         | 3          | 1          |
| 16 | 76  | M   | 2         | 1         | 2          | 1          |
| 17 | 52  | M   | 1         | 1         | 1          | 1          |
| 18 | 62  | M   | 4         | 1         | 2          | 1          |
| 19 | 71  | M   | 4         | 1         | 4          | 1          |
| 20 | 72  | M   | 1         | 1         | 1          | 1          |
| 21 | 84  | M   | 1         | 1         | 1          | 1          |
| 22 | 45  | F   | 17        | 1         | 17         | 1          |
| 23 | 58  | F   | 11        | 1         | 11         | 1          |
| 24 | 81  | F   | 10        | 1         | 10         | 1          |
| 25 | 96  | F   | 0         | 0*        | 0          | 0          |
| 26 | 81  | F   | 21        | 1         | 21         | 1          |
| 27 | 64  | M   | 6         | 1         | 6          | 1          |
| 28 | 79  | M   | 1         | 1         | 1          | 1          |
| 29 | 65  | F   | 14        | 1         | 14         | 1          |
| 30 | 78  | M   | 0         | 1         | 0          | 1          |
| 31 | 67  | M   | 9         | 1         | 9          | 1          |
| 32 | 79  | F   | 25        | 0         | 20         | 1          |
| 33 | 79  | M   | 47        | 0         | 47         | 0          |
| 34 | 75  | M   | 10        | 0         | 10         | 0          |
| 35 | 68  | M   | 42        | 0         | 42         | 0          |

|    |    |   |    |   |    |   |
|----|----|---|----|---|----|---|
| 36 | 65 | M | 33 | 0 | 3  | 1 |
| 37 | 68 | F | 33 | 0 | 33 | 0 |
| 38 | 55 | M | 30 | 0 | 30 | 0 |
| 39 | 55 | F | 18 | 0 | 18 | 0 |
| 40 | 84 | F | 13 | 0 | 13 | 0 |
| 41 | 47 | M | 42 | 0 | 23 | 1 |
| 42 | 73 | F | 18 | 0 | 18 | 0 |
| 43 | 77 | F | 10 | 0 | 10 | 0 |
| 44 | 55 | F | 7  | 0 | 7  | 0 |
| 45 | 69 | F | 8  | 0 | 8  | 0 |
| 46 | 68 | F | 2  | 0 | 2  | 0 |
| 47 | 77 | F | 13 | 1 | 3  | 1 |
| 48 | 74 | M | 49 | 0 | 45 | 1 |
| 49 | 61 | M |    |   |    |   |
| 50 | 79 | M |    |   |    |   |
| 51 | 60 | F | 46 | 0 | 1  | 1 |
| 52 | 70 | M | 2  | 1 | 2  | 1 |
| 53 | 72 | M | 27 | 1 | 27 | 1 |
| 54 | 68 | M |    |   |    |   |
| 55 | 73 | F | 4  | 1 | 4  | 1 |
| 56 | 83 | F | 1  | 1 | 1  | 1 |
| 57 | 80 | M |    |   |    |   |
| 58 | 79 | M |    |   |    |   |
| 59 | 79 | M | 20 | 0 | 20 | 0 |
| 60 | 78 | M |    |   |    |   |

Legend: N Number, OS overall survival, PFS progression-free survival. In OS Status and PFS Status: 1 means event and 0 censored.  
\* OS Status was considered censored (died of other cause), since the patient had 96 years of age when deceased.

**Supplementary Table S4.** Summary of the Cox regression multivariate analysis.

|                                        | OS                  |       | PFS                 |       |
|----------------------------------------|---------------------|-------|---------------------|-------|
| <i>N. event</i>                        | 23                  |       | 28                  |       |
| <i>N. censored</i>                     | 17                  |       | 12                  |       |
| <i>N. total</i>                        | 40                  |       | 40                  |       |
| Variables                              | HR (95% CI)         | p     | HR (95% CI)         | p     |
| <i>V600E (Y/N)</i>                     | 0.271 (0.103-0.717) | 0.008 | 0.347 (0.145-0.831) | 0.017 |
| <i>Stage (I,II,III,IV,V)</i>           | 3.044 (1.003-9.238) | 0.049 | 2.453 (0.983-6.121) | 0.055 |
| <i>Therapy (TKI, IT, CT and CT-IT)</i> | 0.548 (0.356-0.842) | 0.006 | 0.607 (0.417-0.883) | 0.009 |

Legend: N number, OS overall survival, PFS progression-free survival, HR hazard ratio, CI confidence interval, Y yes, N no, CT chemotherapy, IT immunotherapy, TKI tyrosine kinase inhibitor.
